# Supplementary material
Source: publisher figshare collection journal article supplement (https://sage.figshare.com/ndownloader/files/14146577)
Supplement: Supplementary file 1 [file 14146577]

Appendix D. Mean dimensional placements of EUvox and euandi by party family, initial and modified scales

| Dimension<br>Party | Left-right (initial) |       |            | Left-right (modified) |       |            | Cultural (initial) |       |            | Cultural (modified) |       |            | EU (initial) |       |            | EU (modified) |       |            |
|--------------------|----------------------|-------|------------|-----------------------|-------|------------|--------------------|-------|------------|---------------------|-------|------------|--------------|-------|------------|---------------|-------|------------|
|                    | euandi               | EUvox | Diff.      | euandi                | EUvox | Diff.      | euandi             | EUvox | Diff.      | euandi              | EUvox | Diff.      | euandi       | EUvox | Diff.      | euandi        | EUvox | Diff.      |
| Whole party sample | .39                  | .43   | <b>.04</b> | .42                   | .43   | .01        | .45                | .44   | .02        | .49                 | .46   | <b>.02</b> | .60          | .63   | <b>.03</b> | .61           | .62   | .01        |
| Centre-right       | .55                  | .65   | <b>.09</b> | .65                   | .65   | .00        | .60                | .59   | .01        | .66                 | .64   | .02        | .72          | .77   | <b>.04</b> | .77           | .77   | .00        |
| Centre-left        | .21                  | .30   | <b>.08</b> | .20                   | .26   | <b>.06</b> | .34                | .34   | .01        | .36                 | .35   | .01        | .80          | .79   | .01        | .80           | .78   | .02        |
| Liberals           | .52                  | .65   | <b>.13</b> | .60                   | .65   | <b>.05</b> | .39                | .37   | .02        | .37                 | .39   | .02        | .71          | .75   | .04        | .75           | .79   | .04        |
| Radical left       | .12                  | .06   | <b>.06</b> | .06                   | .06   | .00        | .22                | .21   | .01        | .22                 | .21   | .01        | .34          | .50   | <b>.16</b> | .26           | .43   | <b>.17</b> |
| Populist right     | .56                  | .43   | <b>.13</b> | .55                   | .47   | <b>.09</b> | .78                | .74   | .04        | .86                 | .78   | <b>.08</b> | .24          | .23   | .01        | .25           | .21   | .05        |
| Green              | .15                  | .25   | <b>.10</b> | .16                   | .24   | <b>.08</b> | .20                | .21   | .00        | .24                 | .21   | .03        | .74          | .73   | .01        | .71           | .71   | .00        |
| ECR                | .58                  | .54   | .04        | .60                   | .54   | .06        | .73                | .62   | <b>.11</b> | .78                 | .69   | <b>.09</b> | .40          | .44   | .04        | .42           | .44   | .02        |

Note: Dimensional scales range from 0 (left, liberal, anti-EU) to 1 (right, conservative, pro-EU). Initial scales are the original scales, as they were calculated in the VAA-s. For modified scales we have removed the statements that failed either in terms of dimensionality or sufficient polarization between parties.

Statistically significant differences are marked in bold.
